# Supplementary material for: Pharmacological targeting of glucose-6-phosphate dehydrogenase in human erythrocytes by Bay 11–7082, parthenolide and dimethyl fumarate
Source: PubMed Central journal article supplement (PMC4926109; doi:10.1038/srep28754), 2016-06-29
Supplement: srep28754-s1.pdf [file srep28754-s1.pdf]

# **Pharmacological targeting of glucose-6-phosphate dehydrogenase in human erythrocytes by Bay 11-7082, parthenolide and dimethyl fumarate**

Mehrdad Ghashghaeinia<sup>1\*</sup>, Daniela Giustarini<sup>2</sup>, Pavla Koralkova<sup>3</sup>, Martin Köberle<sup>4</sup>, Kousi Alzoubi<sup>5</sup>, Rosi Bissinger<sup>5</sup>, Zohreh Hosseinzadeh<sup>6</sup>, Peter Dreischer<sup>7</sup>, Ingolf Bernhardt<sup>8</sup>, Florian Lang<sup>5</sup>, Mahmoud Toulany<sup>9</sup>, Thomas Wieder<sup>10</sup>, Renata Mojzikova<sup>3</sup>, Ranieri Rossi<sup>2</sup>, Ulrich Mrowietz<sup>1</sup>

<sup>1</sup>Psoriasis-Center, Department of Dermatology, University Medical Center Schleswig-Holstein, Campus Kiel, Schittenhelmstr. 7, Kiel, 24105, Germany; <sup>2</sup>Department of Life Sciences, Laboratory of Pharmacology and Toxicology, University of Siena, Via A Moro 2, 53100, Siena, Italy; <sup>3</sup>Department of Biology, Faculty of Medicine and Dentistry Palacky University, Hnevotinska 3, 77515 Olomouc, Czech Republic; <sup>4</sup>Department of Dermatology and Allergy, Biedersteinerstr. 29, Technische Universität München, 80802 München, Germany; <sup>5</sup>Department of Cardiology, Vascular Medicine and Physiology, University of Tübingen, Gmelinstr. 5, 72076, Tübingen, Germany; <sup>6</sup>Centre for Ophthalmology, Institute for Ophthalmic Research, Eberhard-Karls-University, Tübingen, Germany; <sup>7</sup>Institute of Physiology II, Eberhard Karls University of Tübingen, Keplerstr. 15, 72074 Tübingen, Germany; <sup>8</sup>Saarland University, Campus A2.4, 66123 Saarbrücken, Germany; <sup>9</sup>Division of Radiobiology and Molecular Environmental Research, Department of Radiation Oncology, Eberhard Karls University Tübingen, Roentgenweg 11, 72076 Tübingen, Germany, <sup>10</sup>Department of Dermatology; Eberhard Karls University; Tübingen, Germany

\* Corresponding author

**Supplementary Information File**

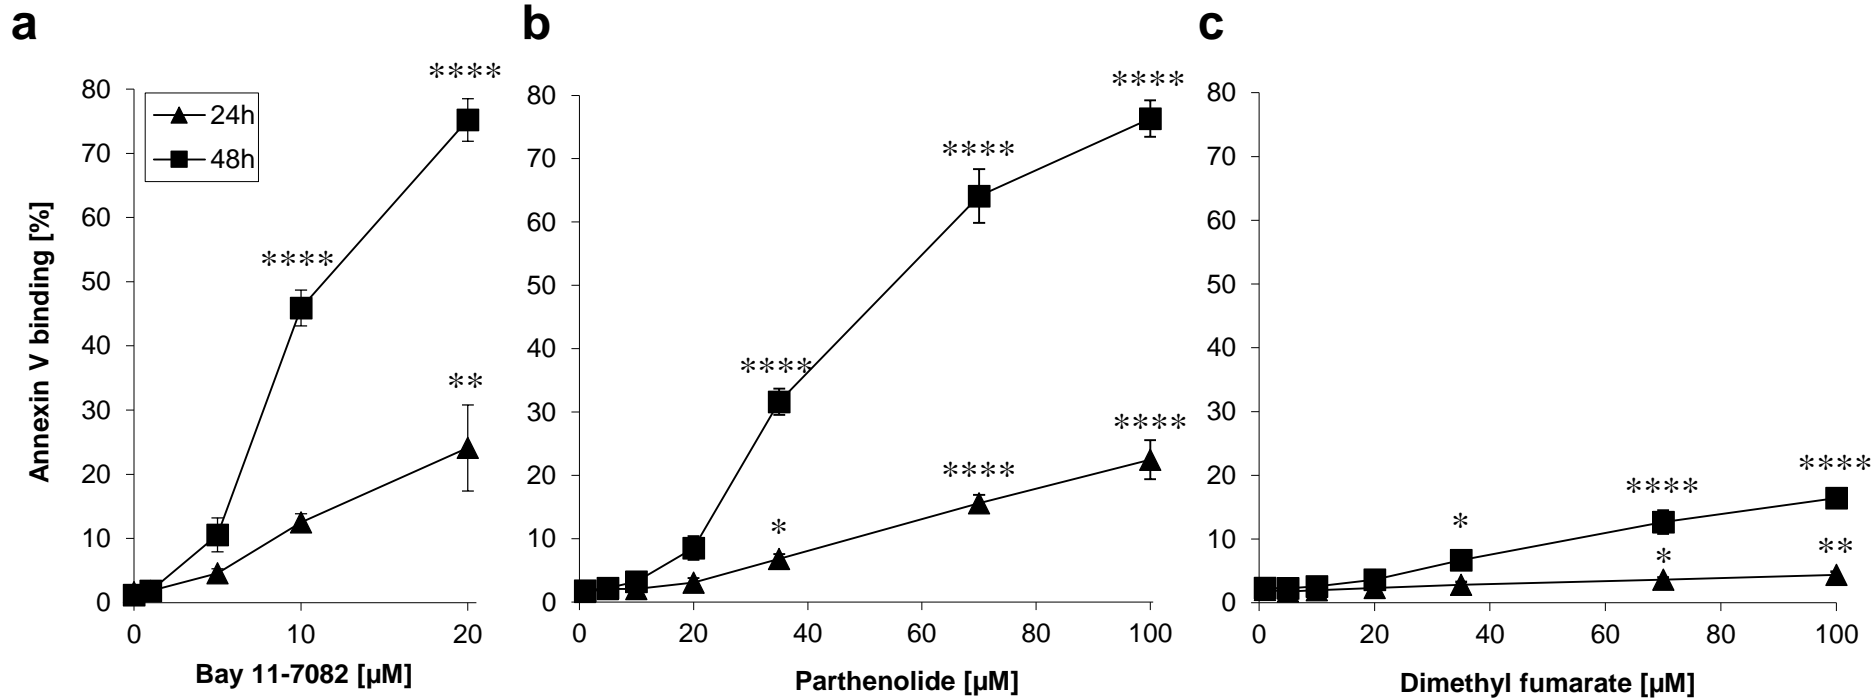

### Supplementary Figure 1

Effects of Bay 11-7082 (**A**), parthenolide (**B**) and dimethyl fumarate (DMF) (**C**) on eryptosis. Erythrocytes were exposed either to Bay 11-7082 (1-20  $\mu\text{M}$ ), parthenolide (1-100  $\mu\text{M}$ ) or DMF (1-100  $\mu\text{M}$ ) in Ringer solution for 24 h and 48 h. DMSO (0.2% v/v)-treated erythrocytes served as negative control. The values shown are the mean  $\pm$  SEM of three independent experiments each performed with three replicates.

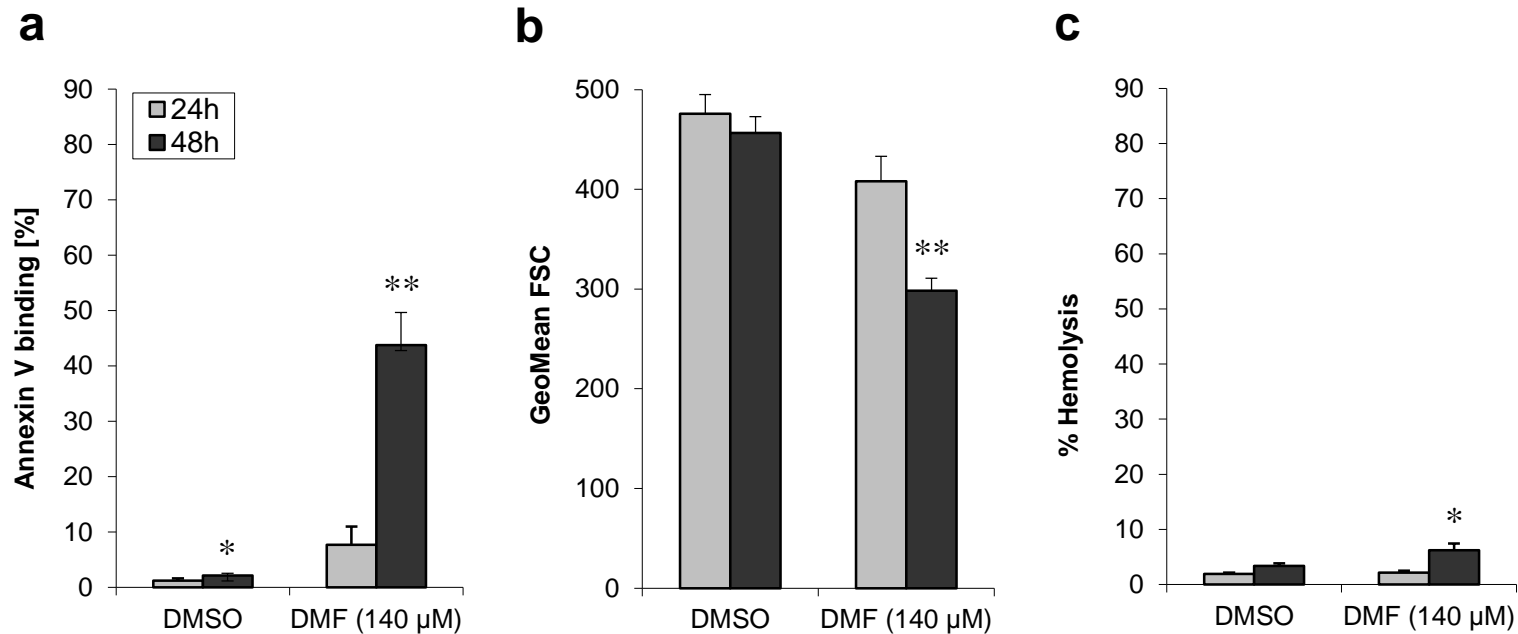

## Supplementary Figure 2

Effects of dimethyl fumarate (DMF) (**A**) on eryptosis, (**B**) cell shrinkage and (**C**) hemolysis. Erythrocytes were exposed to DMF (140 μM) in Ringer solution for 24 h and 48 h. DMSO (0.2% v/v)-treated erythrocytes served as negative control. Annexin V assay and hemolysis were performed as outlined in material and methods. The values shown are the mean ± SEM of three independent experiments each performed with three replicates.

**a**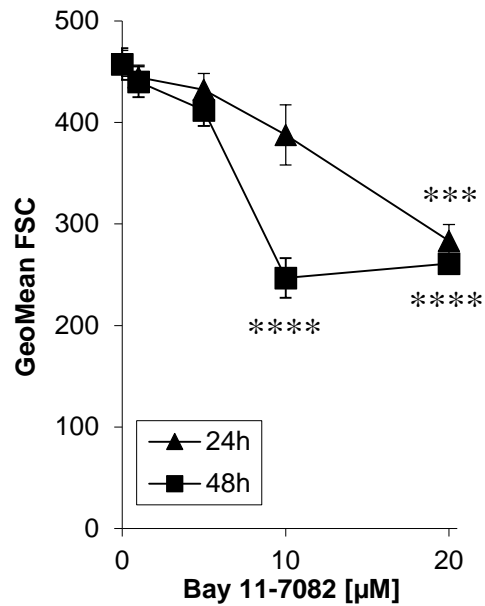**b**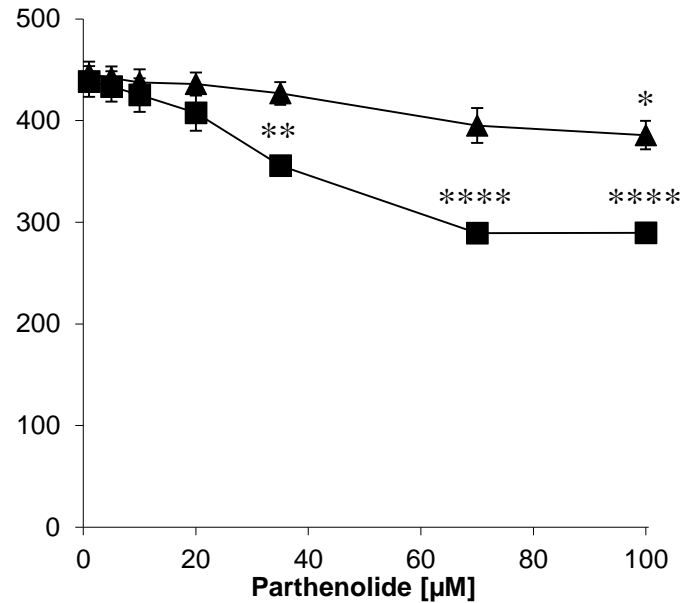**c**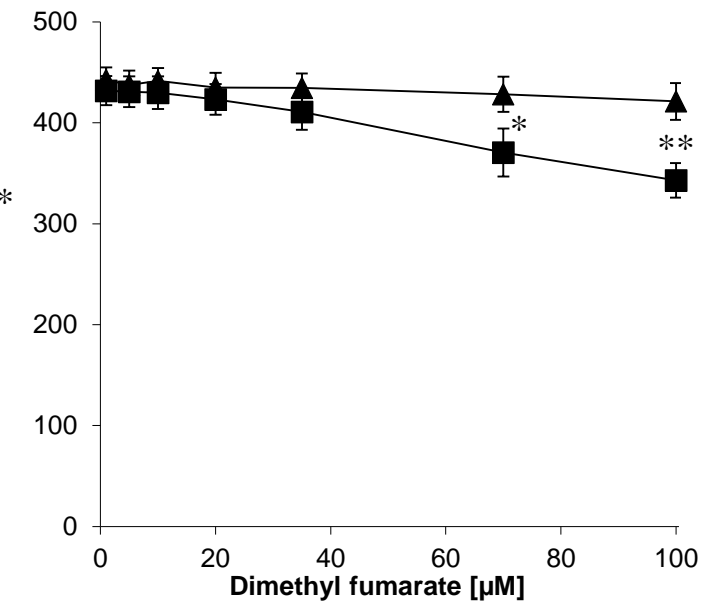

### Supplementary Figure 3

Effects of Bay 11-7082 (**A**), parthenolide (**B**) and dimethyl fumarate (DMF) (**C**) on cell shrinkage.

Erythrocytes were exposed either to Bay 11-7082 (1-20  $\mu\text{M}$ ), parthenolide (1-100  $\mu\text{M}$ ) or DMF (1-100  $\mu\text{M}$ ) in Ringer solution for 24 h and 48 h. DMSO (0.2% v/v)-treated erythrocytes served as negative control. The values shown are the mean  $\pm$  SEM of three independent experiments each performed with three replicates.

**a**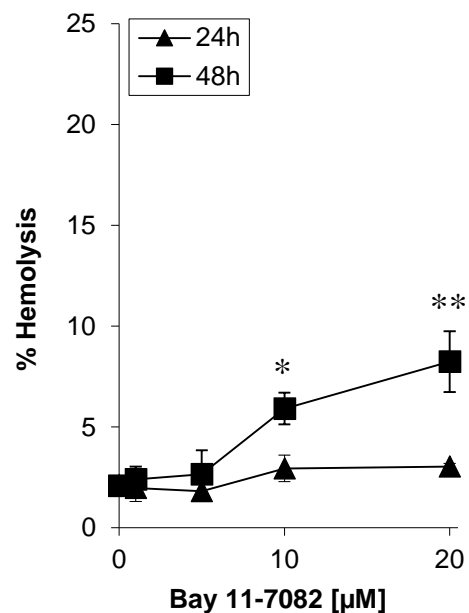**b**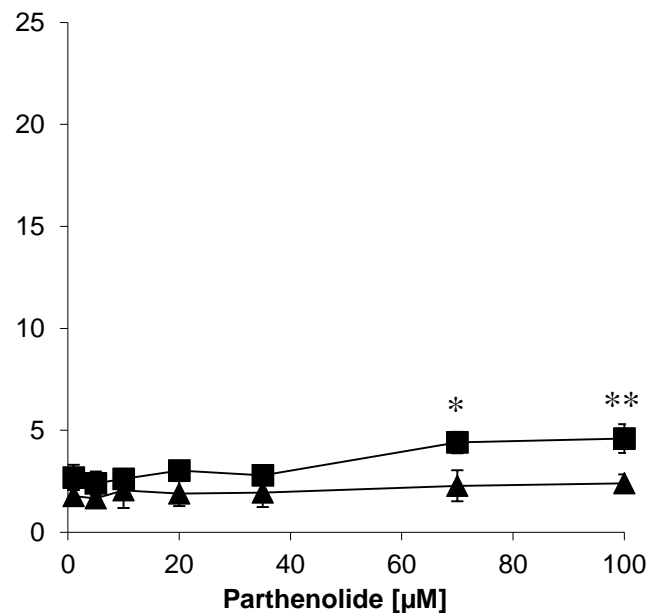**c**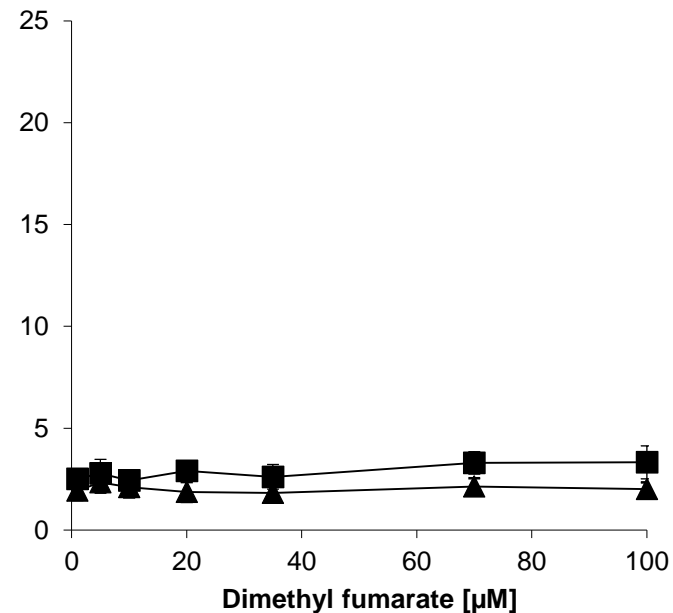

### Supplementary Figure 4

Impact of Bay 11-7082 (A), parthenolide (B) and dimethyl fumarate (DMF) (C) on hemolysis. Hemolysis intensity was measured as the increase in turbidity of the erythrocytes' supernatants, harvested from the corresponding erythrocytes' suspensions already treated with DMSO or with increasing concentrations of the inhibitors. The values shown are the mean  $\pm$  SEM of three independent experiments each performed with three replicates.
